# Supplementary material for: Establishment of the MethyLight Assay for Assessing Aging, Cigarette Smoking, and Alcohol Consumption
Source: Hindawi journal article supplement (doi:10.1155/2015/451981), 2015-01-01
Supplement: f1 [file 451981.f1.pdf]

## **Supplementary materials**

### **Establishment of the MethyLight assay for assessing aging, cigarette smoking, and alcohol consumption**

Kosuke Endo<sup>1\*</sup>, Jiawei Li<sup>1\*</sup>, Michio Nakanishi<sup>2</sup>, Takashi Asada<sup>3</sup>, Masahiro Ikesue<sup>1</sup>,  
Yoichi Goto<sup>2</sup>, Yasue Fukushima<sup>1</sup>, and Naoharu Iwai<sup>1</sup>

Department of Genomic Medicine<sup>1</sup>, Department of Cardiovascular Medicine<sup>2</sup>, Clinical  
Laboratory<sup>3</sup>, National Cerebral and Cardiovascular Center, 5-7-1 Fujishirodai, Suita,  
Osaka 565-8565, Japan

\*These authors contributed equally to this work

Address correspondence to:

Kosuke Endo, PhD

Department of Genomic Medicine, National Cerebral and Cardiovascular Center

5-7-1 Fujishirodai, Suita, Osaka 565-8565, Japan

Tel: +81-6-6833-5012 Fax: +81-6-6835-2088

E-mail: ko-end@ncvc.go.jp

### **Evaluation of the reproducibility of the MethyLight assay**

A panel of eleven DNA standard samples was prepared by combining the following proportions of plasmid DNA with methylated and unmethylated types of targets: 0%, 10%, 20%, 30%, 40%, 50%, 60%, 70%, 80%, 90%, and 100% methylated DNA. The MethyLight assay was performed in triplicate. The raw data of the Cp values were shown in Table S1.

|                              | Methylation %<br>of DNA std | Cp value of<br>Me run1 | Cp value of<br>Me run2 | Cp value of<br>Me run3 | Cp value of<br>deMe run1 | Cp value of<br>deMe run2 | Cp value of<br>deMe run3 | Avg of<br>DNAm score |
|------------------------------|-----------------------------|------------------------|------------------------|------------------------|--------------------------|--------------------------|--------------------------|----------------------|
| cg25809905<br><i>ITGA2B</i>  | 0                           | 30.93                  | 31.51                  | 31.17                  | 25.32                    | 25.03                    | 25.03                    | 0.02                 |
|                              | 10                          | 30.30                  | 30.00                  | 29.89                  | 25.69                    | 25.55                    | 25.51                    | 0.04                 |
|                              | 20                          | 29.59                  | 29.56                  | 29.71                  | 26.66                    | 26.35                    | 26.60                    | 0.11                 |
|                              | 30                          | 28.65                  | 28.66                  | 28.71                  | 26.50                    | 26.40                    | 26.46                    | 0.18                 |
|                              | 40                          | 27.08                  | 27.23                  | 27.40                  | 25.62                    | 25.75                    | 25.77                    | 0.26                 |
|                              | 50                          | 27.56                  | 27.46                  | 27.51                  | 27.02                    | 26.95                    | 26.92                    | 0.41                 |
|                              | 60                          | 27.02                  | 26.93                  | 26.99                  | 27.56                    | 27.66                    | 27.51                    | 0.60                 |
|                              | 70                          | 26.62                  | 26.58                  | 26.68                  | 27.77                    | 27.78                    | 27.81                    | 0.69                 |
|                              | 80                          | 26.74                  | 26.68                  | 26.80                  | 28.17                    | 28.20                    | 28.21                    | 0.73                 |
|                              | 90                          | 26.20                  | 26.11                  | 26.09                  | 28.62                    | 28.67                    | 28.73                    | 0.85                 |
|                              | 100                         | 25.79                  | 25.74                  | 25.74                  | 29.78                    | 29.86                    | 29.81                    | 0.94                 |
| cg02228185<br><i>ASPA</i>    | 0                           | 37.73                  | 32.60                  | 34.70                  | 25.50                    | 25.57                    | 25.50                    | 0.00                 |
|                              | 10                          | 28.38                  | 28.51                  | 28.46                  | 25.82                    | 25.99                    | 25.89                    | 0.15                 |
|                              | 20                          | 27.55                  | 27.74                  | 27.48                  | 26.06                    | 25.95                    | 25.97                    | 0.25                 |
|                              | 30                          | 27.02                  | 27.22                  | 27.27                  | 26.20                    | 26.52                    | 26.36                    | 0.36                 |
|                              | 40                          | 26.50                  | 26.72                  | 26.61                  | 26.22                    | 26.72                    | 26.56                    | 0.48                 |
|                              | 50                          | 26.07                  | 26.04                  | 25.75                  | 26.34                    | 26.40                    | 26.28                    | 0.57                 |
|                              | 60                          | 25.70                  | 26.19                  | 26.09                  | 26.79                    | 27.19                    | 26.99                    | 0.67                 |
|                              | 70                          | 25.36                  | 25.85                  | 25.63                  | 26.88                    | 27.38                    | 27.01                    | 0.74                 |
|                              | 80                          | 25.18                  | 25.55                  | 25.34                  | 27.28                    | 27.72                    | 27.43                    | 0.81                 |
|                              | 90                          | 24.91                  | 25.28                  | 24.92                  | 28.01                    | 28.29                    | 27.87                    | 0.89                 |
|                              | 100                         | 25.70                  | 25.67                  | 25.50                  | 38.51                    | 38.84                    | 32.67                    | 1.00                 |
| cg17861230<br><i>PDE4C-1</i> | 0                           | 32.49                  | 32.62                  | 32.52                  | 29.49                    | 29.46                    | 29.47                    | 0.11                 |
|                              | 10                          | 32.26                  | 32.24                  | 32.28                  | 29.65                    | 29.69                    | 29.66                    | 0.14                 |
|                              | 20                          | 31.80                  | 31.68                  | 31.73                  | 29.77                    | 29.77                    | 29.80                    | 0.20                 |
|                              | 30                          | 31.41                  | 31.43                  | 31.45                  | 29.72                    | 29.78                    | 29.80                    | 0.24                 |
|                              | 40                          | 31.28                  | 31.23                  | 31.26                  | 29.92                    | 29.97                    | 29.96                    | 0.29                 |
|                              | 50                          | 31.01                  | 31.10                  | 30.94                  | 30.06                    | 30.06                    | 30.06                    | 0.34                 |
|                              | 60                          | 30.90                  | 30.89                  | 30.90                  | 30.19                    | 30.18                    | 30.20                    | 0.38                 |
|                              | 70                          | 30.57                  | 30.56                  | 30.55                  | 30.75                    | 30.75                    | 30.75                    | 0.53                 |
|                              | 80                          | 31.11                  | 30.86                  | 30.90                  | 31.61                    | 31.59                    | 31.60                    | 0.61                 |
|                              | 90                          | 31.10                  | 30.98                  | 30.91                  | 32.37                    | 32.41                    | 32.37                    | 0.72                 |
|                              | 100                         | 31.37                  | 30.81                  | 30.85                  | 33.99                    | 34.04                    | 34.04                    | 0.89                 |
| cg17861230<br><i>PDE4C-2</i> | 0                           | 50.00                  | 50.00                  | 50.00                  | 24.50                    | 24.46                    | 24.37                    | 0.00                 |
|                              | 10                          | 27.99                  | 28.09                  | 27.61                  | 24.69                    | 24.47                    | 24.31                    | 0.09                 |
|                              | 20                          | 26.40                  | 26.40                  | 25.78                  | 23.93                    | 24.45                    | 24.19                    | 0.20                 |
|                              | 30                          | 25.38                  | 25.21                  | 25.29                  | 24.25                    | 24.41                    | 24.28                    | 0.34                 |
|                              | 40                          | 24.54                  | 25.12                  | 24.86                  | 24.47                    | 24.71                    | 24.97                    | 0.48                 |
|                              | 50                          | 24.50                  | 24.02                  | 24.22                  | 24.89                    | 24.70                    | 25.06                    | 0.61                 |
|                              | 60                          | 24.05                  | 23.73                  | 24.03                  | 25.18                    | 24.86                    | 25.17                    | 0.69                 |
|                              | 70                          | 23.94                  | 23.58                  | 23.75                  | 25.66                    | 25.27                    | 25.47                    | 0.77                 |
|                              | 80                          | 23.54                  | 23.41                  | 23.34                  | 25.93                    | 25.79                    | 25.74                    | 0.84                 |
|                              | 90                          | 23.52                  | 23.40                  | 23.44                  | 26.94                    | 26.89                    | 26.82                    | 0.91                 |
|                              | 100                         | 20.81                  | 20.75                  | 20.41                  | 28.98                    | 28.96                    | 28.96                    | 1.00                 |
| cg23576855<br><i>AHRR</i>    | 0                           | 40.00                  | 40.00                  | 40.00                  | 28.56                    | 28.52                    | 28.50                    | 0.00                 |
|                              | 10                          | 31.56                  | 31.07                  | 31.60                  | 28.84                    | 28.80                    | 28.70                    | 0.14                 |
|                              | 20                          | 30.34                  | 30.87                  | 30.51                  | 28.85                    | 29.51                    | 29.18                    | 0.28                 |
|                              | 30                          | 29.52                  | 29.56                  | 29.22                  | 28.87                    | 28.80                    | 28.29                    | 0.37                 |
|                              | 40                          | 29.85                  | 29.47                  | 29.64                  | 29.36                    | 29.31                    | 29.59                    | 0.46                 |
|                              | 50                          | 29.55                  | 28.89                  | 29.15                  | 29.88                    | 29.15                    | 29.33                    | 0.54                 |
|                              | 60                          | 29.09                  | 28.88                  | 28.99                  | 30.01                    | 29.68                    | 30.41                    | 0.67                 |
|                              | 70                          | 29.34                  | 29.32                  | 29.29                  | 31.23                    | 31.08                    | 31.01                    | 0.78                 |
|                              | 80                          | 28.80                  | 28.70                  | 28.73                  | 31.33                    | 31.24                    | 31.28                    | 0.85                 |
|                              | 90                          | 27.80                  | 27.68                  | 27.65                  | 31.60                    | 31.42                    | 31.40                    | 0.93                 |
|                              | 100                         | 26.06                  | 26.26                  | 26.13                  | 38.24                    | 38.39                    | 38.60                    | 1.00                 |
| cg02583484<br><i>HNRNP1</i>  | 0                           | 40.00                  | 40.00                  | 40.00                  | 22.04                    | 22.11                    | 21.97                    | 0.00                 |
|                              | 10                          | 24.63                  | 24.45                  | 24.51                  | 22.54                    | 22.37                    | 22.49                    | 0.19                 |
|                              | 20                          | 23.60                  | 23.60                  | 23.62                  | 22.68                    | 22.63                    | 22.71                    | 0.34                 |
|                              | 30                          | 23.38                  | 23.19                  | 23.23                  | 23.05                    | 22.90                    | 23.11                    | 0.46                 |
|                              | 40                          | 22.82                  | 22.72                  | 22.82                  | 22.91                    | 22.98                    | 22.85                    | 0.52                 |
|                              | 50                          | 22.37                  | 22.41                  | 22.36                  | 23.08                    | 23.06                    | 23.01                    | 0.61                 |
|                              | 60                          | 22.91                  | 22.58                  | 22.66                  | 23.96                    | 23.72                    | 23.80                    | 0.68                 |
|                              | 70                          | 22.02                  | 22.22                  | 22.17                  | 23.52                    | 23.62                    | 23.61                    | 0.73                 |
|                              | 80                          | 22.73                  | 22.40                  | 22.17                  | 24.69                    | 24.31                    | 24.28                    | 0.80                 |
|                              | 90                          | 22.23                  | 21.76                  | 21.94                  | 24.80                    | 24.73                    | 24.77                    | 0.87                 |
|                              | 100                         | 21.80                  | 21.74                  | 21.73                  | 26.04                    | 26.20                    | 26.30                    | 0.96                 |

## The multiple regression analysis using each factors.

To define the age predictor, the DNAm rates at four sites, sex, BMI, smoking history, and alcohol drinking history were treated as independent variables in a multiple regression analysis.

Furthermore, to evaluate the effect on AHRR and HNRNPA1 methylation status, age, sex, BMI, smoking history, and alcohol drinking history were treated as independent variables in a multiple regression analysis. The *p*-values were shown in Table S2.

| Table S2 The results of the multiple regression analysis |                      |                |
|----------------------------------------------------------|----------------------|----------------|
|                                                          | independent variable | <i>P</i> value |
| age                                                      | PDE4C1               | 0.036          |
|                                                          | ITGA2B               | <.0001         |
|                                                          | ASPA                 | 0.419          |
|                                                          | PDE4C2               | 0.403          |
|                                                          | sex                  | 0.900          |
|                                                          | BMI                  | 0.790          |
|                                                          | smoking              | 0.812          |
|                                                          | alcohol              | 0.630          |
| <i>AHRR</i>                                              | age                  | 0.164          |
|                                                          | sex                  | 0.564          |
|                                                          | BMI                  | 0.323          |
|                                                          | smoking              | <.0001         |
|                                                          | alcohol              | 0.747          |
| <i>HNRNPA1</i>                                           | age                  | 0.520          |
|                                                          | sex                  | 0.230          |
|                                                          | BMI                  | 0.278          |
|                                                          | smoking              | 0.722          |
|                                                          | alcohol              | 0.023          |

## The measurement of the DNAm rate in genomic DNA derived from hair and oral mucosa

(A)

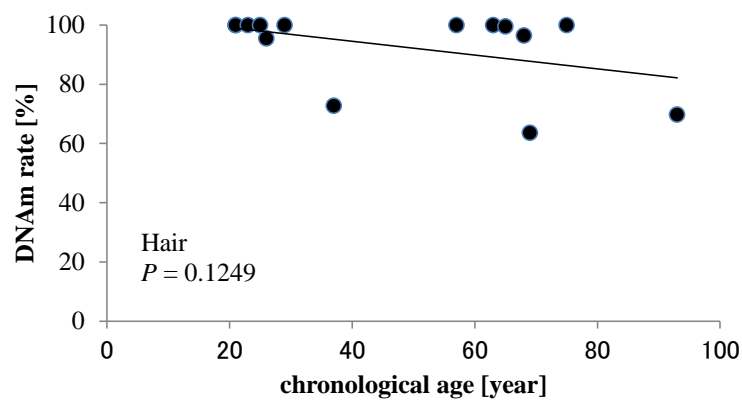

(B)

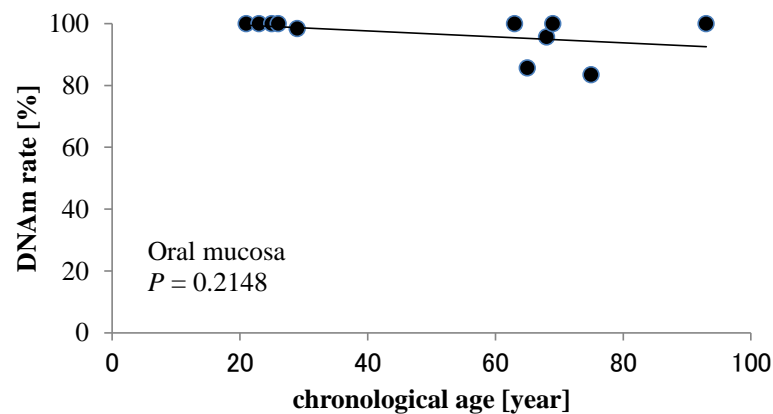

**Figure S1 The methylation rate of cg25809905 in *ITGA2B* in hair and oral mucosa**

As a preliminary study, the methylation rate of cg25809905 in *ITGA2B* was measured in some DNA samples derived from hair (A) and oral mucosa (B). As a result, cg25809905

in *ITGA2B* in hair and oral mucosa was methylated approximately, and the correlation with the age was absent.

### ROC curve analysis for smoking history and alcohol drinking

(A)

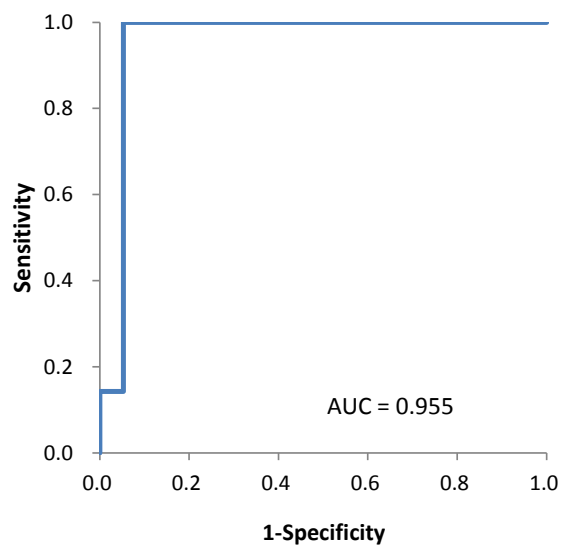

(B)

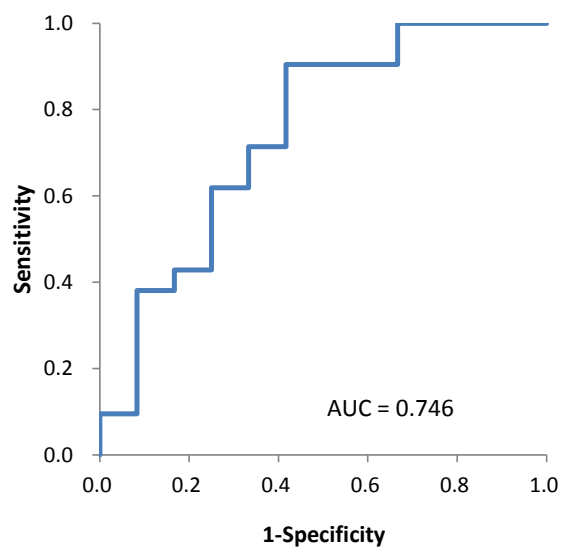

Figure S2 ROC curve analysis for smoking history and alcohol drinking

ROC curve analysis for discrimination between current smoker and never smoker by  
DNAm rate of *AHRR* (A), habitual and never alcohol drinking by DNAm rate of  
*HNRNPA1* (B)
